# Supplementary material for: Genomic malaria surveillance of antenatal care users detects reduced transmission following elimination interventions in Mozambique
Source: PubMed Central journal article supplement (PMC10944499; doi:10.1038/s41467-024-46535-x), 2024-03-16
Supplement: 41467_2024_46535_MOESM3_ESM.pdf [file 41467_2024_46535_MOESM3_ESM.pdf]

### **Description of Additional Supplementary Files**

File Name: Supplementary Data 1

Description: Primers used for amplicon sequencing
